# Supplementary material
Source: PubMed Central journal article supplement (PMC7099586)
Supplement: oc9b01216_si_001.pdf [file oc9b01216_si_001.pdf]

# Supporting Information

## Bottlebrush bridge between soft gels and firm tissues

*Andrew N. Keith,<sup>1</sup> Mohammad Vatankhah-Varnosfaderani,<sup>1</sup> Charles Clair,<sup>2</sup> Farahmaz Fahimipour,<sup>1</sup> Erfan Dashtimoghadam,<sup>1</sup> Abdelaziz Lallam,<sup>2</sup> Michael Sztucki,<sup>3</sup> Dimitri A. Ivanov,<sup>4,5,6\*</sup> Heyi Liang,<sup>7</sup> Andrey V. Dobrynin,<sup>7\*</sup> Sergei S. Sheiko<sup>1\*</sup>*

<sup>1</sup>Department of Chemistry, University of North Carolina at Chapel Hill, 27599, USA

<sup>2</sup>Université de Haute Alsace, Laboratoire de Physique et Mécanique Textiles, 11 rue Alfred Werner, F-68093 Mulhouse Cedex, France

<sup>3</sup>European Synchrotron Radiation Facility, F-38043 Grenoble, France

<sup>4</sup>Institut de Sciences des Matériaux de Mulhouse-IS2M, CNRS UMR 7361, 15, rue Jean Starcky, F-68057 Mulhouse, France

<sup>5</sup>Lomonosov Moscow State University, Faculty of Fundamental Physical and Chemical Engineering, Leninskie Gory 1/51, 119991, Moscow, Russian Federation

<sup>6</sup>Institute of Problems of Chemical Physics, Russian Academy of Sciences, Chernogolovka, Moscow region, 142432, Russian Federation

<sup>7</sup>Department of Polymer Science, University of Akron, Ohio, 44325-3909, USA

## S1. Effect of nonlinear deformation of bottlebrush blocks on domain structure and network elastic properties.

**Equilibrium Domain Spacing.** Consider an LBL triblock copolymer consisting of linear  $L$ -blocks with the degree polymerization (DP)  $n_L$  and bottlebrush  $B$ -block with backbone DP  $n_{bb}$ . In the bottlebrush block, side chains with DP  $n_{sc}$  are attached to every monomer of the backbone such that the number of bonds between neighboring grafting point is  $n_g=1$ . The properties of the linear  $L$ -chains are characterized by the bond length (monomer projection length)  $l_L$ , Kuhn length  $b_L$  and monomer pervaded volume  $v_L$ . For bottlebrush  $B$ -block, we assume that backbones and side chains are made of identical monomers with bond length  $l_B$ , Kuhn length  $b_B$  and monomer pervaded volume  $v_B$ . Interactions between side chains stiffen bottlebrush blocks such that the effective Kuhn length of the bottlebrush block  $b_k$  depends on the value of the crowding parameter,  $\Phi$ , describing the degree of mutual interpenetration between side chains and backbones of the neighboring bottlebrush macromolecules.<sup>31</sup> The crowding parameter depends on the monomer excluded volume  $v_B$ , bond length  $l_B$ , Kuhn length  $b_B$ , DP of the side chains  $n_{sc}$  and volume fraction of the backbone monomers

$$\varphi = \frac{n_g}{n_g + n_{sc}} \quad (S.1)$$

and has the following form

$$\Phi \approx \frac{v_B}{(l_B b_B)^{3/2}} \frac{\varphi^{-1}}{n_{sc}^{1/2}} \quad (S.2)$$

For bottlebrush macromolecules the effective Kuhn length scales linear with the crowding parameter such as

$$b_K \approx b_B \Phi / \Phi^* \quad (S.3)$$

The crossover value of the crowding parameter  $\Phi^* \approx 0.7$  was determined from analysis of the renormalization of the effective Kuhn length of graft polymers in a melt.<sup>31</sup>

The composition of the triblock copolymers is characterized by the volume fraction of the  $L$ -blocks which is defined as follows

$$\phi_L = \frac{2v_L n_L}{2v_L n_L + v_B (n_{bb} n_{sc} / n_g + n_{bb})} = \frac{2v_L n_L}{2v_L n_L + v_B n_{bb} / \varphi} \quad (S.4)$$

This defines the bottlebrush elongation ratio or the equilibrium distance between spherical aggregates as a function of the molecular parameters in the case of the nonlinear deformation of the bottlebrush block.

Flory-like calculations of equilibrium size  $2L_B$  of the bottlebrush block connecting spherical domains of the linear  $B$ -blocks of the microphase separated immiscible  $L$ - and  $B$ -blocks results in the following nonlinear relationship<sup>34</sup>

$$\beta^{3/2}(1 + 2(1 - \beta)^{-2}) = Cd \left( \frac{R_{gl}}{R_{max}} \right)^3 \frac{\gamma_{LB} b_K R_{max}}{k_B T} \quad (S.5)$$

for the bottlebrush block elongation ratio

$$\beta = 4L_B^2/R_{max}^2 \quad (S.6)$$

where  $Cd$  is a numerical constant which value depends on the symmetry of the domain structure,  $\gamma_{LB}$  is the surface tension of the  $LB$ -interface,  $R_{gl} = (3v_L n_L / 4\pi)^{1/3}$  is the size of the collapsed linear block,  $R_{max} = l_B n_{bb}$  is the size of the fully extended bottlebrush backbone,  $k_B$  is the Boltzmann constant and  $T$  is the absolute temperature.

**Deformation of Self-Assembled Bottlebrush Networks.** The deformation of a polymer network undergoing uniaxial deformation is described by the following constitutive equation relating true stress with the network elongation ratio  $\lambda$ :<sup>6,18</sup>

$$\sigma_{true} = \frac{E}{9} (\lambda^2 - \lambda^{-1}) \left( 1 + 2 \left( 1 - \frac{\beta I_1(\lambda)}{3} \right)^{-2} \right) \quad (S.7)$$

where  $I_1(\lambda) = \lambda^2 + 2/\lambda$  is the first deformation invariant. The structural Young's modulus  $E$  and strand elongation ratio  $\beta$  are determined by the molecular architecture of the network strands and their concentration. For incompressible networks the structural shear modulus is related to the structural Young's modulus  $E$  as  $E = 3G$ . The bottlebrush block elongation ratio  $\beta$  is given by eq S.6. Structural Young's modulus of the network,  $E$ , is defined as

$$E \approx C_1 k_B T \frac{\rho_B \varphi}{n_{bb}} \frac{R_{max}}{b_K} \beta (1 - \phi_L) \quad (S.8)$$

where  $C_1$  is a numerical constant on the order of unity accounting for a network topology.

It is important to point out that the structural modulus is different from the Young's modulus at small deformations ( $\lambda \rightarrow 1$ )

$$\left. \frac{d\sigma_{true}}{d\lambda} \right|_{\lambda=1} = E_0 = \frac{E}{3} (1 + 2(1 - \beta)^{-2}) \quad (S.9)$$

Thus, using equation S.8 and S.5 we find the following scaling relation for the Young's modulus at small deformation in terms of the molecular parameters<sup>34</sup>

$$E_0 \approx \frac{\gamma_{LB} R_{gl}^3}{R_{max}} \frac{\rho_B \varphi}{n_{bb}} (1 - \phi_L) \beta^{-1/2} \quad (S.10)$$

Eq S.10 shows a good agreement with the experiment (fig. 3c).

**Table S1: Mechanical parameters of tissues.** All tissues are represented in Fig. 1d and Fig. 3b with highlighted entries selected for Fig. 1a.

| <b>Label</b> | <b>Tissue</b>                    | <b><math>E</math> (Pa)<sup>(1)</sup></b> | <b><math>\beta</math><sup>(1)</sup></b> | <b><math>E_0</math> (kPa)<sup>(2)</sup></b> | <b>Ref</b> |
|--------------|----------------------------------|------------------------------------------|-----------------------------------------|---------------------------------------------|------------|
| 1            | Porcine aorta                    | 19800                                    | 0.67                                    | 127.8                                       | 35         |
| 2            | Dog lung                         | 300                                      | 0.69                                    | 2.2                                         | 36         |
| 3            | Brain                            | 60                                       | 0.75                                    | 0.7                                         | 37         |
| 4            | Blood vessel                     | 3400                                     | 0.75                                    | 37.4                                        | 38         |
| 5            | Fetal membrane                   | 1300                                     | 0.79                                    | 20.1                                        | 39         |
| 6            | Lens capsule                     | 10800                                    | 0.90                                    | 723.6                                       | 40         |
| 7            | Heart muscle                     | 20                                       | 0.96                                    | 8.3                                         | 41         |
| 8            | Human abdominal skin             | 1200                                     | 0.93                                    | 163.7                                       | 42         |
| 9            | Eel skin                         | 7800                                     | 0.84                                    | 205.7                                       | 43         |
| 10           | Mice skin                        | 2600                                     | 0.90                                    | 174.2                                       | 44         |
| 11           | Porcine skin parallel spine      | 5800                                     | 0.74                                    | 59.1                                        | 45         |
| 12           | Porcine skin perpendicular spine | 10600                                    | 0.46                                    | 27.8                                        | 45         |
| 13           | Human alveolar wall              | 84                                       | 0.87                                    | 3.3                                         | 46         |
| 14           | Human vocal fold ligament        | 147                                      | 0.93                                    | 20.0                                        | 47         |
| 15           | Zonular filaments                | 69                                       | 0.92                                    | 7.2                                         | 48         |
| 16           | RA muscle fiber bundle           | 204                                      | 0.75                                    | 2.3                                         | 49         |
| 17           | Human single muscle fiber        | 2016                                     | 0.54                                    | 7.0                                         | 50         |
| 18           | Wild turkey muscle               | 441                                      | 0.90                                    | 29.5                                        | 51         |
| 19           | Human adipose tissue             | 7                                        | 0.96                                    | 3.0                                         | 52         |
| 20           | Pig belly slow rate              | 5457                                     | 0.45                                    | 13.8                                        | 53         |
| 21           | Artery adventitia A              | 348                                      | 0.91                                    | 28.8                                        | 54         |
| 22           | Porcine meniscus                 | 23508                                    | 0.97                                    | 17421                                       | 55         |
| 23           | Thrombus                         | 12                                       | 0.98                                    | 19.5                                        | 56         |
| 24           | Invertebral disk posterior       | 606                                      | 0.93                                    | 82.7                                        | 57         |
| 25           | Invertebral disk anterior        | 208                                      | 0.96                                    | 86.6                                        | 57         |
| 26           | Spinal cord                      | 2724                                     | 0.84                                    | 71.8                                        | 58         |
| 27           | Porcine brain                    | 1005                                     | 0.72                                    | 8.9                                         | 59         |

<sup>(1)</sup> Structural modulus  $E$  and strain-stiffening parameter  $\beta$  are fitting parameters in eq. 1. <sup>(2)</sup> Young's modulus at small deformations which can be determined either as tangent of a stress-strain curve at  $\lambda = 1$  or from fitting equation eq. 2.

**Table S2: Mechanical parameters of gels.** All gels are represented in Fig. 1d and Fig. 3b with highlighted entries selected for Fig. 1b.

| Label | Gel <sup>(1)</sup>                 | $E$ (kPa) <sup>(2)</sup> | $\beta$ <sup>(2)</sup> | $E_0$ (kPa) <sup>(3)</sup> | Ref |
|-------|------------------------------------|--------------------------|------------------------|----------------------------|-----|
| 1     | Zwitterionic sulfobetaine          | 5.70                     | 0.0041                 | 5.7                        | 60  |
| 2     | PAM/Surfactant                     | 6.38                     | 0.015                  | 6.5                        | 61  |
| 3     | PAM/Surfactant                     | 16.5                     | 0.036                  | 17.3                       | 61  |
| 4     | Synthetic elastin                  | 263.9                    | 0.02                   | 271.1                      | 62  |
| 5     | PDMA/Silica                        | 1.49                     | 0.008                  | 1.5                        | 63  |
| 6     | PEDOT/PSS                          | 91.5                     | 0.128                  | 110.7                      | 64  |
| 7     | PEDOT/PSS                          | 30.8                     | 0.077                  | 34.4                       | 64  |
| 8     | PAMAP/PAM                          | 733.2                    | 0.219                  | 1047                       | 65  |
| 9     | PAM                                | 245.7                    | 0.074                  | 272.9                      | 65  |
| 10    | Clay nanocomposite                 | 1.36                     | 0.005                  | 1.4                        | 66  |
| 11    | Bimodal PEG                        | 2.82                     | 0.163                  | 3.6                        | 67  |
| 12    | Polyrotaxane                       | 9.41                     | 0.033                  | 9.8                        | 68  |
| 13    | PNIPAM/Clay nanocomposite          | 77.1                     | 0.005                  | 77.5                       | 69  |
| 14    | PAM/Clay nanocomposite             | 1435                     | 0.002                  | 1438                       | 70  |
| 15    | Microfibrillated cellulose/Elastin | 116.9                    | 0.436                  | 284.0                      | 71  |
| 16    | PAM/Xanthan Gum                    | 140.2                    | 0.001                  | 140.3                      | 72  |
| 17    | PAM/Xanthan Gum                    | 560.9                    | 0.001                  | 561.6                      | 72  |
| 18    | ICE PAM/Alginate                   | 105.5                    | 0.026                  | 109.3                      | 73  |
| 19    | PAM/Alginate                       | 75.8                     | 0.259                  | 117.4                      | 74  |
| 20    | PAM/Alginate with Cations          | 112.8                    | 0.029                  | 117.4                      | 75  |
| 21    | Iota-carrageenan/PAM               | 8.09                     | 0.001                  | 8.1                        | 76  |
| 22    | Kappa-carrageenan/PAM              | 23.8                     | 0.254                  | 36.4                       | 76  |
| 23    | PVA/PAM                            | 74.2                     | -                      | 74.2                       | 77  |
| 24    | PDGI/PAM-PAA                       | 48.6                     | 0.007                  | 49.1                       | 78  |
| 25    | PDGI/PAM                           | 44.9                     | 0.007                  | 45.4                       | 78  |
| 26    | PAM/PAA                            | 2.03                     | 0.119                  | 2.4                        | 78  |
| 27    | Graphene/PAACA                     | 6.58                     | 0.042                  | 6.9                        | 79  |
| 28    | PAACA                              | 2.15                     | 0.114                  | 2.5                        | 79  |
| 29    | PNVP/PAA                           | 12.3                     | 0.297                  | 20.7                       | 80  |
| 30    | PAA/SAPS                           | 106.5                    | 0.038                  | 112.2                      | 81  |

<sup>(1)</sup> Gel name represents the defining features and chemistry, for specifics please visit referenced literature.

<sup>(2)</sup> Structural modulus  $E$  and strain-stiffening parameter  $\beta$  are fitting parameters in eq. 1. <sup>(3)</sup> Young's modulus at small deformations which can be determined either as tangent of a stress-strain curve at  $\lambda = 1$  or from the fitting equation eq. 2.

**Table S3: Structural and mechanical parameters of reported LBL PMMA-PDMS-PMMA.**

| <b>Sample</b>                                          | $n_{bb}^{(1)}$ | $n_L^{(2)}$ | $\phi_L^{(3)}$ | $E(kPa)^{(4)}$ | $\beta^{(4)}$ | $E_0(kPa)^{(5)}$ | $d_3 (nm)^{(6)}$ | $D_L (nm)^{(7)}$ | $d_1 (nm)^{(8)}$ |
|--------------------------------------------------------|----------------|-------------|----------------|----------------|---------------|------------------|------------------|------------------|------------------|
| <b>Group 1 (<math>n_{sc} = 14</math>)<sup>9)</sup></b> |                |             |                |                |               |                  |                  |                  |                  |
| 300-1/14                                               | 302            | 57          | 0.030          | 4.5            | 0.48          | 12.8             | 42.9             | 20.8             | 3.44             |
| 300-2/14                                               | 302            | 117         | 0.059          | 5.5            | 0.56          | 20.4             | 45               | 25.5             | 3.45             |
| 300-3/14                                               | 302            | 181         | 0.089          | 5.6            | 0.69          | 41.5             | 45.7             | 30.2             | 3.45             |
| 600-1/14                                               | 602            | 295         | 0.074          | 2.9            | 0.30          | 4.9              | NA               | NA               | NA               |
| 600-2/14                                               | 602            | 351         | 0.087          | 3.6            | 0.35          | 6.9              | NA               | NA               | NA               |
| 600-3/14                                               | 602            | 677         | 0.155          | 4.4            | 0.42          | 10.1             | NA               | NA               | NA               |
| 600-4/14                                               | 602            | 803         | 0.179          | 5.0            | 0.51          | 15.3             | NA               | NA               | NA               |
| 900-1/14                                               | 938            | 190         | 0.032          | 3.3            | 0.29          | 5.4              | 55.5             | 24.3             | 3.48             |
| 900-2/14                                               | 938            | 325         | 0.053          | 3.6            | 0.33          | 6.5              | 59.3             | 32.3             | 3.44             |
| 900-3/14                                               | 938            | 656         | 0.102          | 4.7            | 0.45          | 11.8             | 78.8             | 50.9             | 3.42             |
| 900-4/14                                               | 938            | 1235        | 0.177          | 6.2            | 0.67          | 39.3             | 141              | NA               | 3.43             |
| 1200-1/14                                              | 1065           | 360         | 0.052          | 3.3            | 0.26          | 5.1              | 66.4             | 33.4             | 3.56             |
| 1200-2/14                                              | 1065           | 480         | 0.068          | 3.8            | 0.30          | 6.4              | 79.1             | 42.8             | 3.56             |
| 1200-3/14                                              | 1065           | 810         | 0.110          | 3.9            | 0.36          | 7.8              | 77.4             | 45.7             | 3.55             |
| <b>Group 2 (<math>n_{sc} = 70</math>)<sup>9)</sup></b> |                |             |                |                |               |                  |                  |                  |                  |
| 100-1/70                                               | 112            | 105         | 0.029          | 12.8           | 0.71          | 106.2            | 28.5             | 12.0             | 7.10             |
| 100-2/70                                               | 112            | 131         | 0.036          | 11.0           | 0.76          | 130.0            | 33.8             | 15.3             | 7.06             |
| 100-3/70                                               | 112            | 185         | 0.050          | 6.12           | 0.84          | 155.7            | 37.1             | 18.7             | 7.05             |
| 300-1/70                                               | 296            | 156         | 0.017          | 1.07           | 0.77          | 13.3             | 71.05            | 24.8             | 7.15             |
| 300-2/70                                               | 296            | 285         | 0.030          | 1.05           | 0.80          | 18.3             | 69.97            | 29.7             | 7.10             |
| 300-3/70                                               | 296            | 507         | 0.052          | 0.80           | 0.85          | 24.8             | 90               | 45.9             | 7.03             |
| 300-4/70                                               | 296            | 754         | 0.075          | 0.75           | 0.91          | 55.7             | 113              | 65.3             | 7.06             |
| 450-1/70                                               | 447            | 288         | 0.020          | 1.32           | 0.71          | 11.2             | 66.3             | 24.6             | 6.95             |
| 450-2/70                                               | 447            | 604         | 0.041          | 1.49           | 0.78          | 20.4             | 84.5             | 39.9             | 6.94             |
| 450-3/70                                               | 447            | 772         | 0.052          | 1.16           | 0.81          | 22.3             | 82.2             | 42.0             | 6.93             |
| 450-4/70                                               | 447            | 894         | 0.060          | 1.29           | 0.82          | 26.3             | 102.2            | 54.6             | 6.90             |

<sup>(1)</sup> Degree of polymerization (DP) of bottlebrush block backbone determined by <sup>1</sup>H-NMR and verified by AFM (Fig. S6,8). <sup>(2)</sup> DP of PMMA linear block by <sup>1</sup>H-NMR (Fig. S7). <sup>(3)</sup> Volume fraction of L-block calculated using  $\phi_L = (2n_L M_{MMA} / \rho_{MMA}) / (2n_L M_{MMA} / \rho_{MMA} + n_{bb} M_{sc} / \rho_{PDMS})$  where  $\rho_{PMMA} = 1.15 \text{ g/cm}^3$ ,  $\rho_{PDMS} = 0.96 \text{ g/cm}^3$ ,  $M_{MMA} = 100 \text{ g/mol}$  and where  $M_{sc} = 1024 \text{ g/mol}$  and  $M_{sc} = 5227 \text{ g/mol}$  are the respective molar masses of Group 1 and 2 macromonomers measured by NMR. <sup>(4)</sup> Structural modulus and strain-stiffening parameter obtained by fitting stress-strain curves with eq. 1. <sup>(5)</sup> Young's modulus from eq 2. <sup>(6)</sup> Position of the main interference peak (see text for details). <sup>(7)</sup> Diameter of PMMA spherical domains is determined from the form-factor of spheres ( $d_2$ ). <sup>(8)</sup> Position of bottlebrush scattering caused by the electron-density contrast between the brush backbone and that of the side chains. <sup>(9)</sup> Effective DP of PDMS side chains determined as  $n_{sc} = M_{sc} / M_0$  where  $M_0 = 74 \text{ g/mol}$  is molar mass of PDMS monomer.

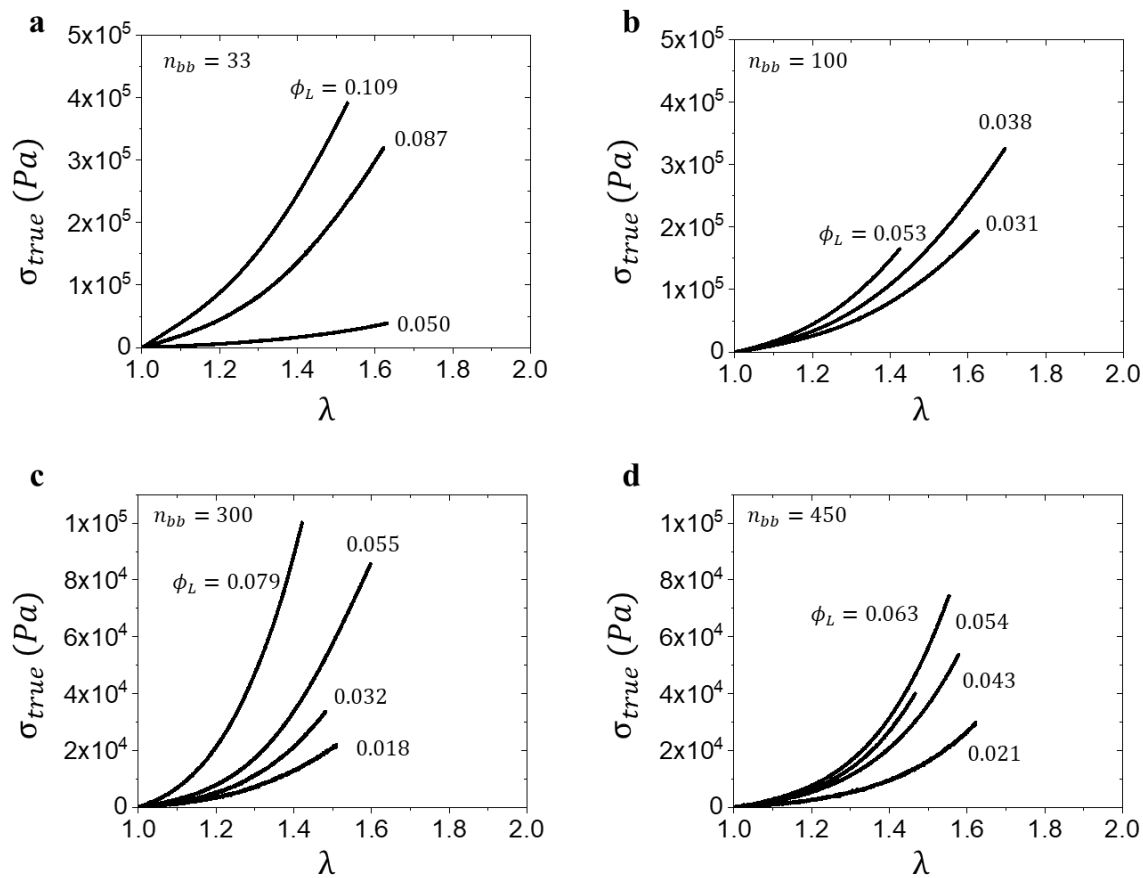

**Figure S1:** True stress-elongation curve profiles of  $n_{sc} = 70$  LBL plastomer series. (a) 33-x/70 (b) 100-x/70 (c) 300-x/70 (d) 450-x/70.

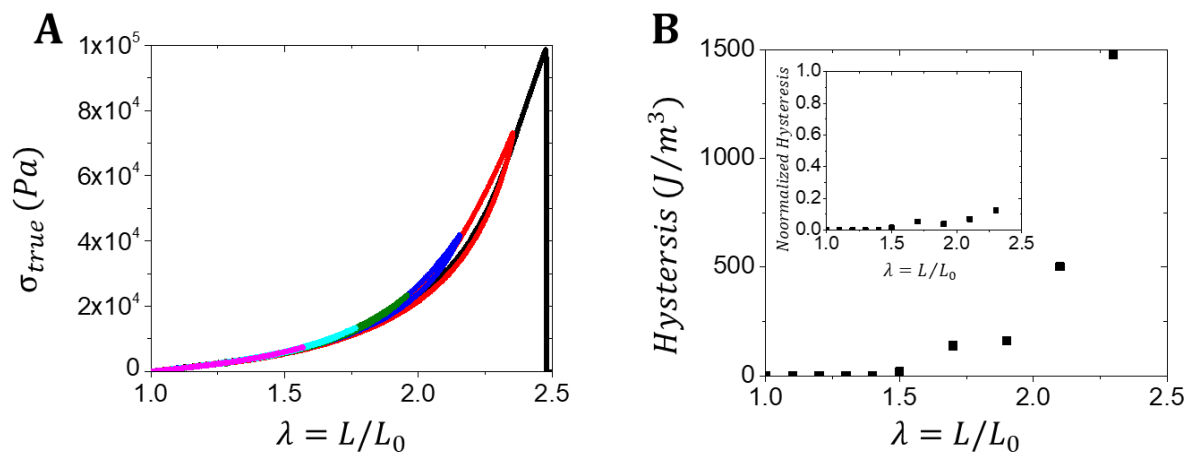

**Figure S2:** (A) Cyclic loading-unloading curves of 1200-3/14. Stress-strain curves reveal the emergence of a hysteresis at  $\lambda \approx 0.6 \lambda_{max}$ . (B) Hysteresis energy as a function of elongation, inset: normalized hysteresis.



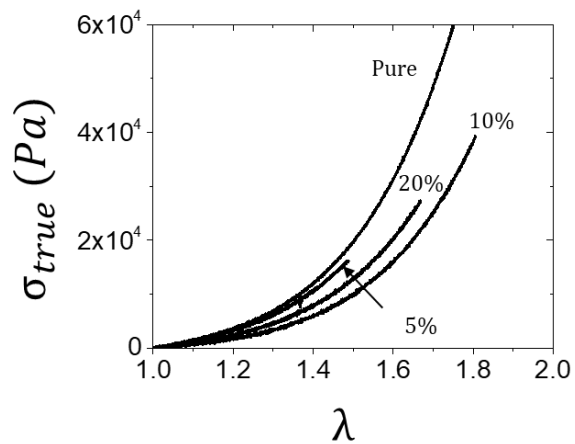

| Sample <sup>(1)</sup> | $\lambda_{fit}$ | $E$ (kPa) | $\beta$ | $E_0$ (kPa) |
|-----------------------|-----------------|-----------|---------|-------------|
| Pure                  | 1.3             | 1.6       | 0.718   | 14.5        |
| 5%                    | 1.3             | 1.4       | 0.728   | 12.9        |
| 10%                   | 1.5             | 1.2       | 0.711   | 9.8         |
| 20%                   | 1.4             | 0.9       | 0.705   | 7.2         |

**Figure S3:** Stress-elongation curves of a pure 300/70 plastomer sample diluted with increasing weight fractions of free bottlebrush and cast from THF, which highlights decoupling  $E_0$  and  $\beta$  as summarized in the table.

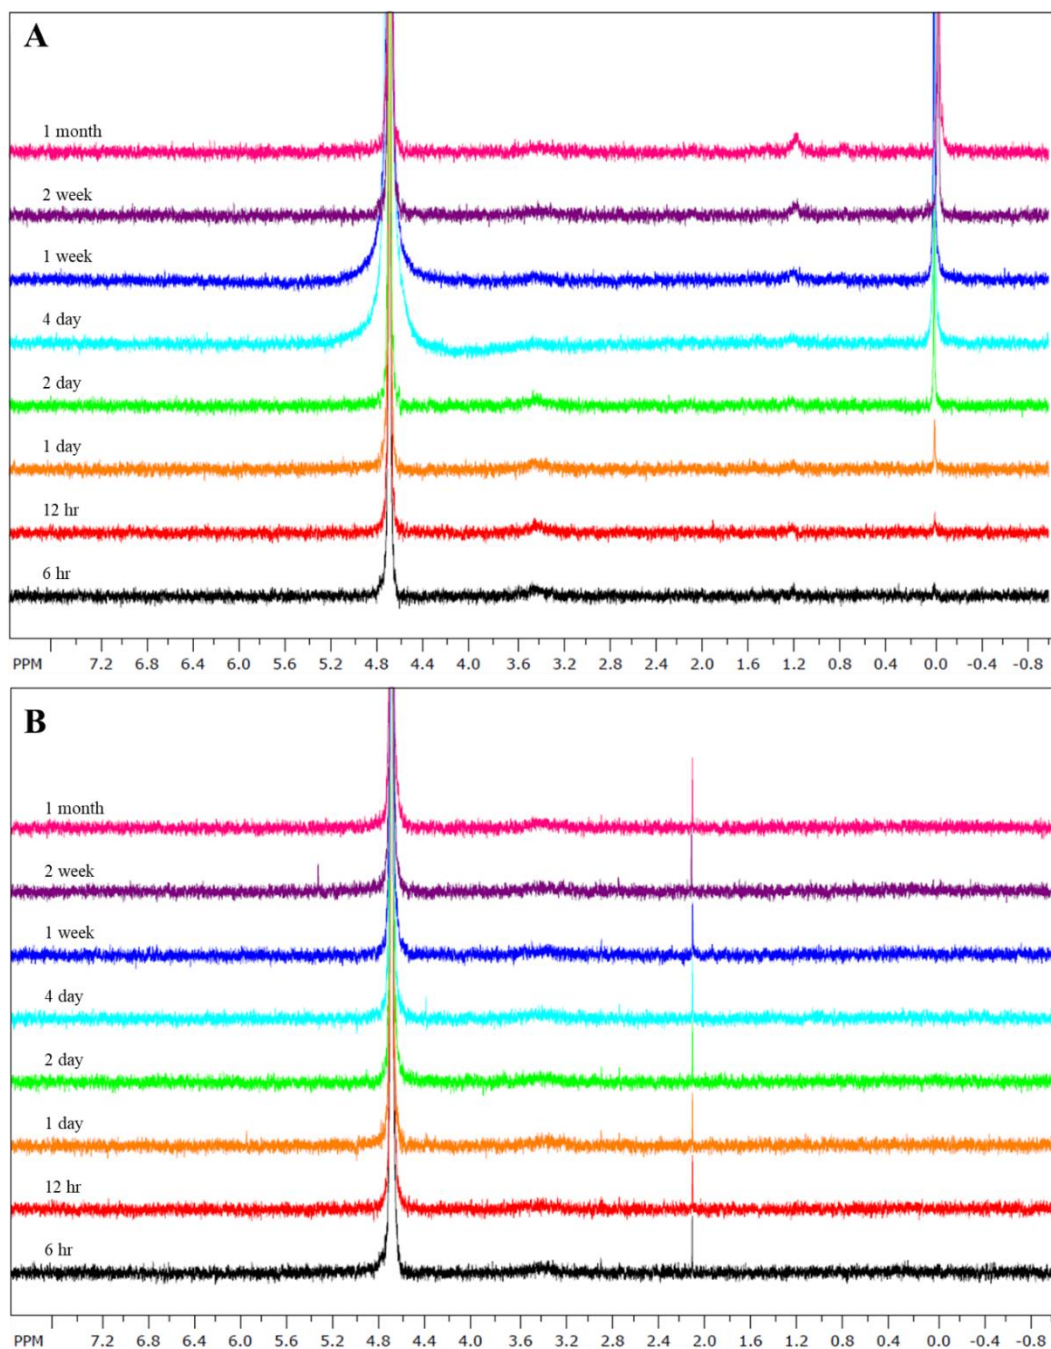

**Figure S4:** Leachability of samples into aqueous medium. **(A)**  $^1\text{H-NMR}$  of aqueous extract from a commercial silicone gel used in breast implants monitored over a month (400 MHz,  $\text{CDCl}_3$ ): 4.70 (Residual  $\text{H}_2\text{O}$ ), 1.17, 0.01 (unidentified extract). **(B)**  $^1\text{H-NMR}$  of aqueous extract from a 300-1/70 sample monitored over a month (400 MHz,  $\text{D}_2\text{O}$ ): 4.70 (Residual  $\text{H}_2\text{O}$ ), 2.09 (Residual acetone).

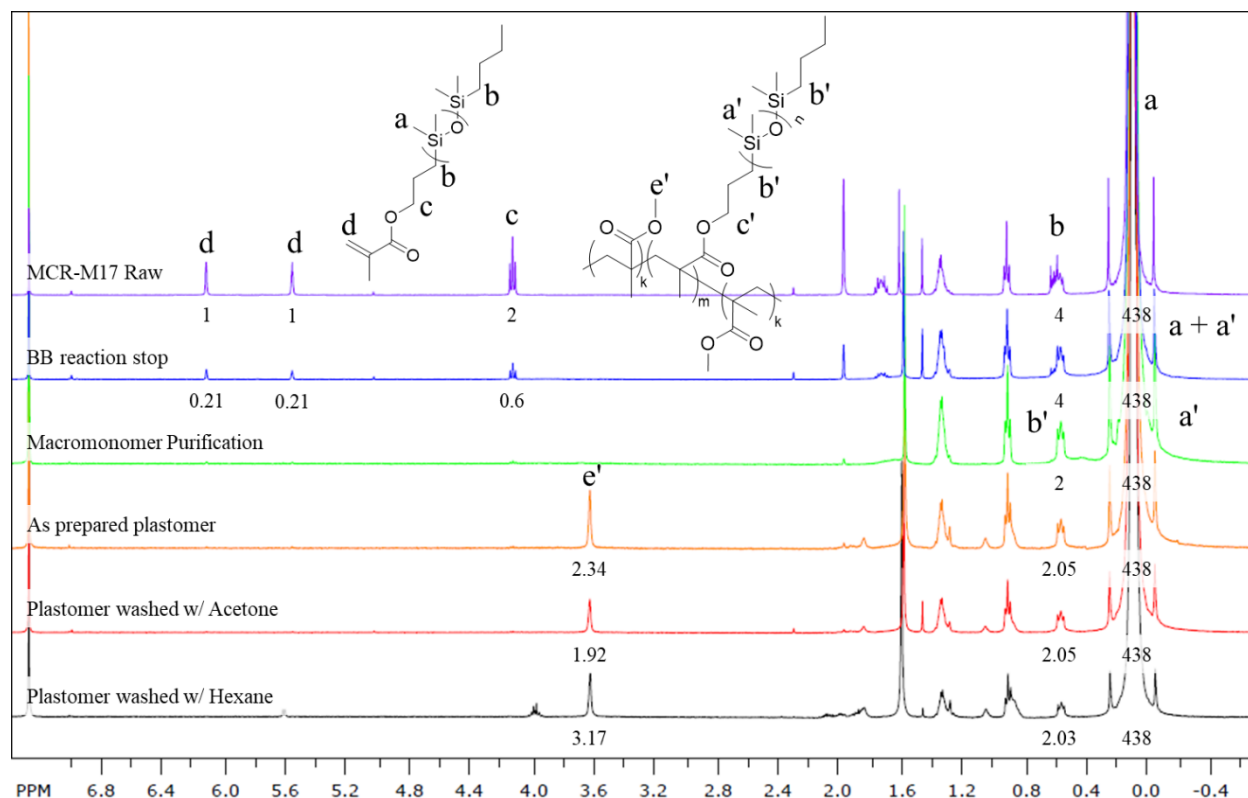

**Figure S5:**  $^1\text{H-NMR}$  of LBL plastomer at different stages of synthesis. (400 MHz,  $\text{CDCl}_3$ ): 6.12, 5.57 ( $\text{CH}_2=\text{C}(\text{CH}_3)\text{C}=\text{O}$ , PDMS macromonomer, s, 1H), 4.12 ( $\text{CO-OCH}_2-$ , PDMS macromonomer, t, 2H), 0.55 ( $-\text{CH}_2-(\text{Si}(\text{CH}_3)_2-\text{O})_n-\text{CH}_2-\text{CH}_2-$ , PDMS macromonomer and bottlebrush mixture, m, 4H) 0.09 ( $-(\text{Si}(\text{CH}_3)_2-\text{O})_n-$ , PDMS macromonomer and bottlebrush mixture, s, 438H).  $\text{Conv}_{\text{PDMS}} = ([\text{Area}(a + a')/438] - [\text{Area}(d)/1])/[\text{Area}(a)/438] = 79\%$ . Peaks c' and 1 set of 2H b' for bottlebrushes with  $n_{\text{sc}} = 70$  do not show on NMR in  $\text{CDCl}_3$  in contrast to  $n_{\text{sc}} = 14$  bottlebrushes. For PMMA-PDMS-PMMA plastomer (400 MHz,  $\text{CDCl}_3$ ): 3.62 ( $\text{COO-CH}_3$ , s, 3H), 0.55 ( $-\text{CH}_2-(\text{Si}(\text{CH}_3)_2-\text{O})_n-\text{CH}_2-\text{CH}_2-$ , m, 2H) 0.09 ( $-(\text{Si}(\text{CH}_3)_2-\text{O})_n-$ , s, 438H).  $n_L = [\text{Area}(e')/3]/[\text{Area}(a)/438] * n_{bb}$  where  $n_{bb} = \text{Conv}_{\text{PDMS}} * \frac{[\text{M}]}{[\text{I}]} = 79\% * 375 = 296$ . Subsequent washing with PDMS anti-solvent acetone and PMMA anti-solvent hexane yields acetone soluble PMMA homopolymer and hexane soluble PDMS bottlebrush respectively.

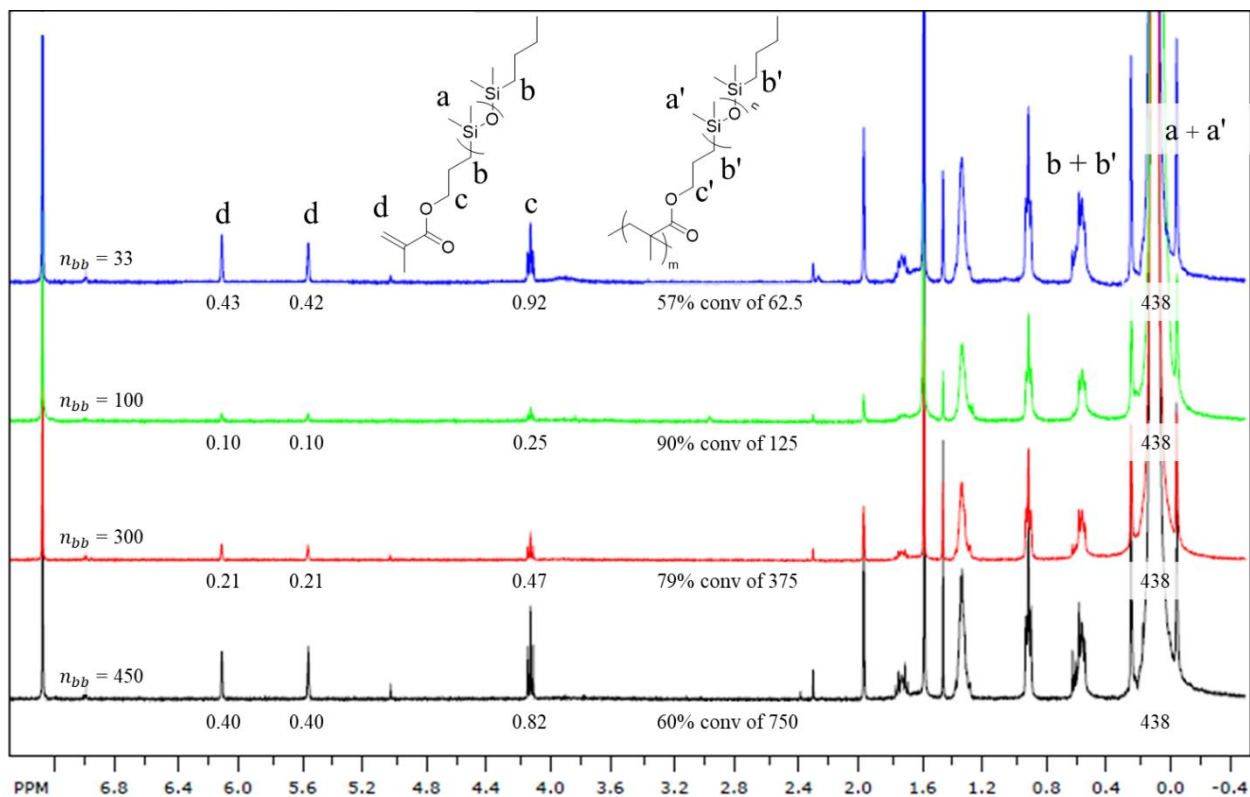

**Figure S6:**  $^1\text{H-NMR}$  of PDMS bottlebrush B-blocks. Unpurified growth of  $n_{sc} = 70$  PDMS brushes (400 MHz,  $\text{CDCl}_3$ ): 6.12, 5.57 ( $\text{CH}_2=\text{C}(\text{CH}_3)\text{C}=\text{O}$ , PDMS macromonomer, s, 1H), 4.12 ( $\text{CO-OCH}_2-$ , PDMS macromonomer, t, 2H), 0.55 ( $-\text{CH}_2-(\text{Si}(\text{CH}_3)_2-\text{O})_n-\text{CH}_2-\text{CH}_2-$ , PDMS macromonomer and bottlebrush mixture, m, 2H) 0.09 ( $-(\text{Si}(\text{CH}_3)_2-\text{O})_n-$ , PDMS macromonomer and bottlebrush mixture, s, 438H). For series 300-x/70,  $\text{Conv}_{PDMS} = ([\text{Area}(a + a')/438] - [\text{Area}(d)/1])/[\text{Area}(a)/438] = 79\%$  ;  $n_{bb} = \text{Conv}_{PDMS} * \frac{[M]}{[I]} = 79\% * 375 = 296$ .

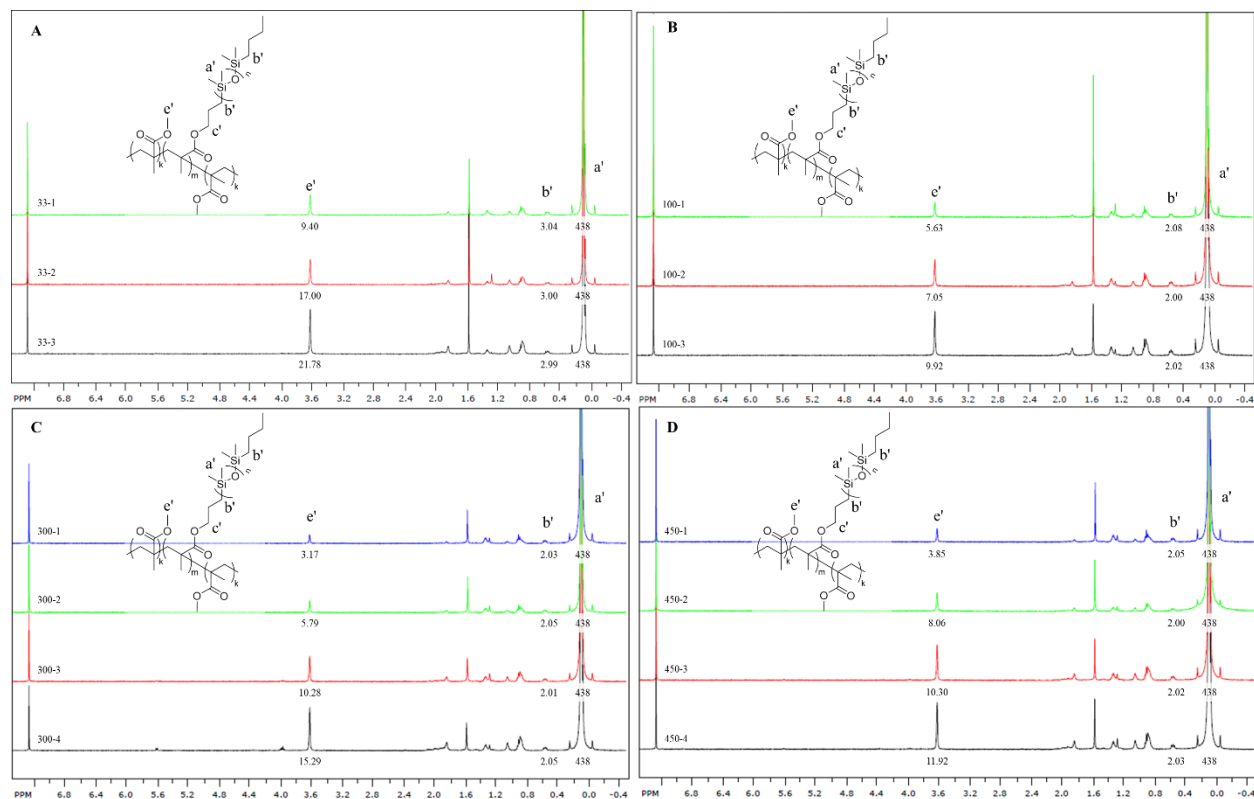

**Figure S7:**  $^1\text{H-NMR}$  of LBL PMMA-PDMS-PMMA triblock copolymers. (400 MHz,  $\text{CDCl}_3$ ): 3.62 ( $\text{COO-CH}_3$ , s, 3H), 0.55 ( $-\text{CH}_2-(\text{Si}(\text{CH}_3)_2\text{-O})_n-\text{CH}_2-\text{CH}_2-$ , m, 2H) 0.09 ( $-\text{Si}(\text{CH}_3)_2-$ , s, 438H).  $n_L = [\text{Area}(e')/3]/[\text{Area}(a')/438] * n_{bb}$ . (A) 33-x/70 series (B) 100-x/70 series (C) 300-x/70 series (D) 450-x/70 series.

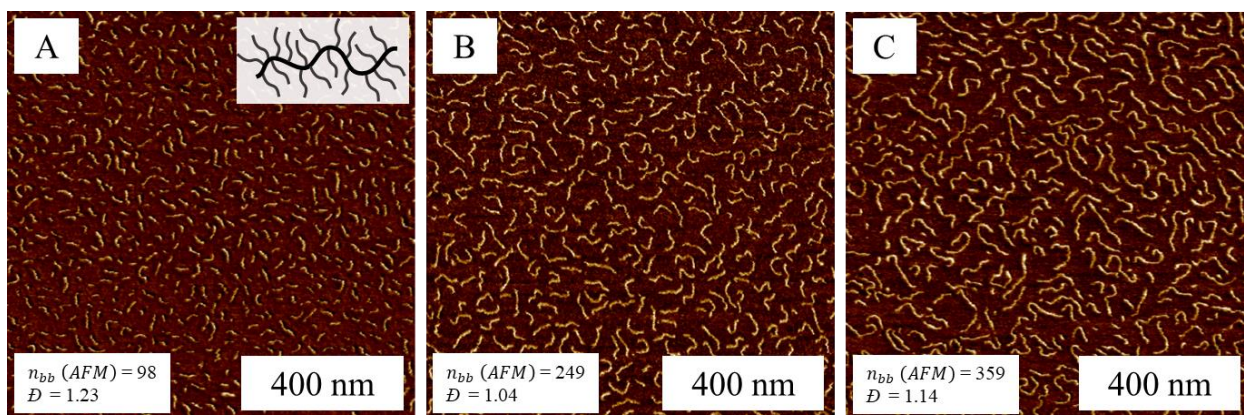

**Figure S8:** Atomic Force Microscopy of brush blocks. Height micrographs of PDMS bottlebrush blocks deposited on mica by Langmuir-Blodgett technique for series (A) 100-x/70 (B) 300-x/70 (C) 450-x/70. Where  $n_{bb}$  is determined by AFM as  $L_n/l_0$  where  $L_n$  is number average measured bottlebrush contour length via AFM and  $l_0 = 0.25$  nm is the length of bottlebrush backbone monomeric unit. Bottlebrush dispersity,  $\mathcal{D} = M_w/M_n$  is calculated from analysis of > 300 molecules.

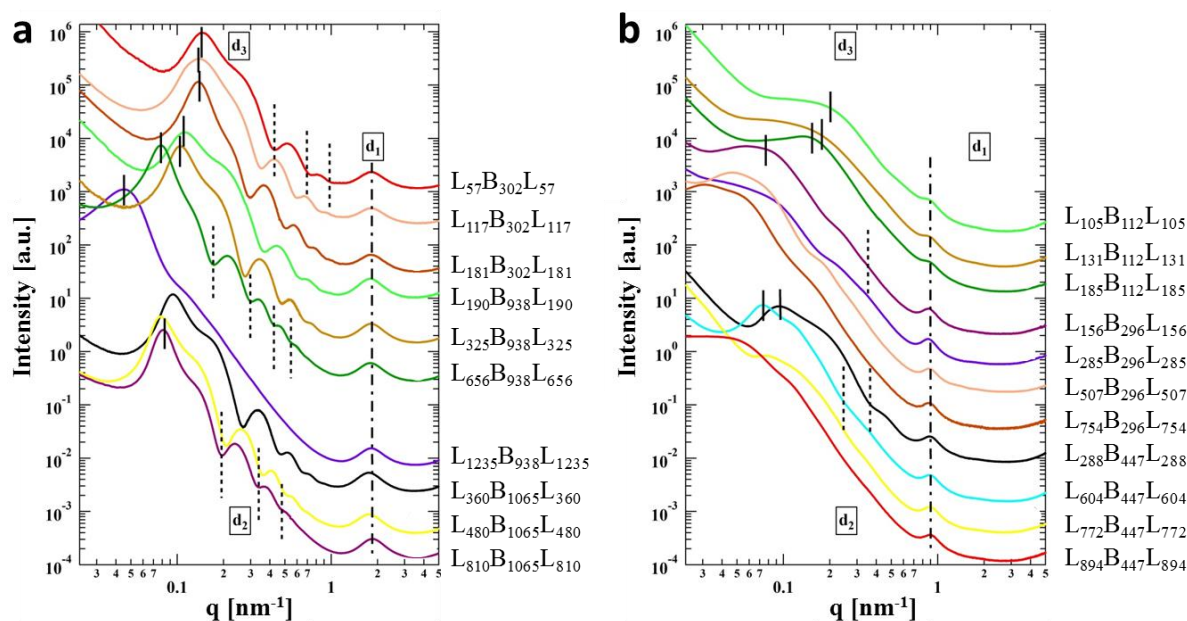

**Figure S9:** Composite of LBL X-ray spectra. (a)  $n_{sc} = 14$  and (b)  $n_{sc} = 70$  plastomers from Table S3.

## REFERENCES

- (34) Liang, H.; Wang, Z.; Dobrynin, A. V. Strain-adaptive self-assembled networks of linear-bottlebrush-linear copolymers. *Macromolecules* **2019**, *52*, doi:10.1021/acs.macromol.9b01859
- (35) Place, E. S.; George, J. H.; Williams, C. K.; Stevens, M. Synthetic polymer scaffolds for tissue engineering. *Chem. Soc. Rev.* **2009**, *38*, 1139-1151.
- (36) Maksym G. N.; Bates, J. H. A distributed nonlinear model of lung tissue elasticity. *J Appl. Physiol.* **1997**, *82*, 32-41.
- (37) Pervin, F.; Chen, W. W. Effect of inter-species, gender, and breeding on the mechanical behavior of brain tissue. *NeuroImage* **2011**, *54*, S98-102.
- (38) Holzapfel, G. A.; Sommer, G.; Regitnig, P. Anisotropic mechanical properties of tissue components in human atherosclerotic plaques. *J. Biomech. Eng.* **2004**, *126*, 657-665.
- (39) Jabareen, M.; Mallik, A. S.; Bilic, G.; Zisch, A. H.; Mazza, E. Relation between mechanical properties and microstructure of human fetal membranes: an attempt towards a quantitative analysis. *Eur. J. Obstet. Gynecol. Reprod. Biol.* **2009**, *144*, 5134-5141.
- (40) Kra, S.; Andreassen, T. T. Mechanical properties of human lens capsule. *Prog. Retin. Eye Res.* **2003**, *22*, 749-767.
- (41) Chen, Q.-Z. Harding, S. E.; Ali, N. N.; Lyon, A. R.; Boccaccini, A. R. Biomaterials in cardiac tissue engineering: ten years of research survey. *Mater. Sci. Eng. R Rep.* **2008**, *59*, 1-37.
- (42) Silver, F. H.; Freeman, J. W.; Devore, D. Viscoelastic properties of human skin and processed dermis. *Skin Res. Tech.* **2001**, *7*, 18-23.
- (43) Hebrank, M. R. Mechanical properties and locomotor functions of eel skin. *Biol. Bull.* **1980**, *158*, 58-68.
- (44) Bancelin, S.; Lynch, B.; Bonod-Bidaud, C.; Ducourthial, G.; Psilodimitrakopoulos, S.; Dokladal, P.; Allain, J. M.; Schanne-Klein, M. C.; Ruggiero F. Ex vivo multiscale quantitation of skin biomechanics in wild-type and genetically-modified mice using multiphoton microscopy. *Sci. Rep.* **2015**, *5*, 17635.
- (45) Lim, J.; Hong, J.; Chen, W.W.; Weerasooriya, T. Mechanical response of pig skin under dynamic tensile loading. *Int. J. Impact. Eng.* **2011**, *38*, 130-135.
- (46) Chen, Z.-L.; Chen, Y.-Z.; Hu, Z.-Y. A micromechanical model for estimating alveolar wall strain in mechanically ventilated edematous lungs. *J. Appl. Physiol.* **2014**, *117*, 586-592.
- (47) Hunter, E. J.; Titze, I. R. Refinements in modeling the passive properties of laryngeal soft tissue. *J. Appl. Physiol.* **2017**, *103*, 206-219.
- (48) Wright, D. M.; Duance, V. C.; Wess, T. J.; Kielty, C. M.; Purslow, P. P. The supramolecular organisation of fibrillin-rich microfibrils determines the mechanical properties of bovine zonular filaments. *J. Exp. Bio.* **1999**, *202*, 3011-3020.
- (49) Brown, S. H.; Carr, J. A.; Ward, S. R.; Lieber, R. L. Passive mechanical properties of rat abdominal wall muscles suggest an important role of the extracellular connective tissue matrix. *J. Orthop. Res.* **2012**, *30*, 1321-1326.
- (50) Malisoux, L.; Francaux, M.; Nielens, H.; Theisen, D. Stretch-shortening cycle exercise: an effective training paradigm to enhance power output of human single muscle fibers. *J. Appl. Physiol.* **2006**, *100*, 771-779.
- (51) Roberts, T. J. Contribution of elastic tissues to the mechanics and energetics of muscle function during movement. *J. Exp. Biol.* **2016**, *219*, 266-275.

- (52) Alkhouli, N.; Mansfield, J.; Green, E.; Bell, J.; Knight, B.; Liversedge, N.; Tham, J. C.; Welbourn R.; Shore, A. C.; Kos, K.; Winlove, C. P. The mechanical properties of human adipose tissues and their relationships to the structure and composition of the extracellular matrix. *Am. Physiol. Soc.* **2013**, *305*, E1427-E1435.
- (53) Zhou, B.; Xu, F.; Chen, C. Q. Strain rate sensitivity of skin tissue under thermomechanical loading. *Phil. Trans. R. Soc.* **2010**, *368*, 679-690.
- (54) Holzapfel, G. A.; Sommer, G.; Gasser, C. T.; Regitnig, P. Determination of layer-specific mechanical properties of human coronary arteries with nonatherosclerotic intimal thickening and related constitutive modeling. *Am. J. Physiol. Heart Circ. Physiol.* **2005**, *289*, H2048-H2058.
- (55) Abdelgaied, A.; Stanley, M.; Galfe, M.; Berry, H.; Ingham, E.; Fisher, J. Comparison of biomechanical tensile and compressive properties of decellularised and natural porcine meniscus. *J. Biomech.* **2015**, *48*, 1389-1396.
- (56) Rausch, M. K.; Humphrey, J. D. A microstructurally inspired damage model for early venous thrombus. *J. Mech. Behav. Biomed. Mater.* **2015**, *55*, 12-20.
- (57) Yang, T. Zhang, C.-q.; Liu, Q.; Li, K.; Yang, X.-p.; Zhang, J.-j. Hu, Y.; Ye, J. The rule of strain in different stratification of the intervertebral disc under physiologic loading. *Biomed. Res.* **2017**, *28*.
- (58) Shreiber, D. I.; Hao, H.; Elias, R. A. Probing the influence of myelin and glia on the tensile properties of the spinal cord. *Biomech. Model. Mechanobiol.* **2009**, *8*, 311-321.
- (59) Rashid, B.; Destrade, M.; Gilchrist, M. D. Mechanical characterization of brain tissue in tension at dynamic strain rates. *J. Mech. Behav. Biomed. Mater.* **2014**, *33*, 43-54.
- (60) Ning, J.; Li, G.; Haraguchi, K. Synthesis of highly stretchable, mechanically tough, zwitterionic sulfobetaine nanocomposite gels with controlled thermosensitivities. *Macromolecules* **2013**, *46*, 5317-5328.
- (61) Tan, M.; Zhao, T.; Huang, H.; Guo, M. Highly stretchable and resilient hydrogels from the copolymerization of acrylamide and a polymerizable macromolecular surfactant. *Poly. Chem.* **2013**, *4*, 5570-5576.
- (62) Mithieux, S. M.; Rasko, J. E.; Weiss, A. S. Synthetic elastin hydrogels derived from massive elastic assemblies of self-organized human protein monomers. *Biomaterials* **2004**, *25*, 4921-4927.
- (63) Carlsson, L.; Rose, S.; Hourdet, D.; Marcellan, A. Nano-hybrid self-crosslinked PDMS/silica hydrogels. *Soft Matter*, **2010**, *6*, 3619-3631.
- (64) Feig, V. R.; Tran, H.; Lee, M.; Bao, Z. Mechanically tunable conductive interpenetrating network hydrogels that mimic the elastic moduli of biological tissue. *Nature Comm.* **2018**, *9*, 2740.
- (65) Gong, J. P.; Katsuyama, Y.; Kurokawa, T.; Osada, Y. Double-Network hydrogels with extremely high mechanical strength. *Adv. Mater.* **2003**, *15*, 1155-1158.
- (66) Haraguchi, K.; Takehisa, T. Nanocomposite hydrogels: a unique organic-inorganic network structure with extraordinary mechanical, optical and swelling/de-swelling properties. *Adv. Mater.* **2002**, *14*, 1120-1124.
- (67) Kondo, S.; Sakurai, H.; Chug, U.; Sakai, T. Mechanical properties of polymer gels with bimodal distribution in stand length. *Macromolecules* **2013**, *46*, 7027-7033.
- (68) Ohmori, K.; Bin, I. A.; Seki, T.; Liu, C.; Mayumi, K.; Ito, K.; Takeoka, Y. Molecular weight dependency of polyrotaxane cross-lined polymer gel extensibility. *Chem. Commun.* **2016**, *52*, 13757.



- (69) Liu, Y.; Zhu, M.; Liu, X.; Zhang, W.; Sun, B.; Chen, Y.; Adler, H.-J. P. High clay content nanocomposite hydrogels with surprising mechanical strength and interesting deswelling kinetics. *Polymer* **2006**, *47*, 1-5.
- (70) Xiong, L.; Hu, X.; Liu, X.; Tong, Z. Network chain density and relaxation of in situ synthesized polyacrylamide/ hectorite clay nanocomposite hydrogels with ultrahigh tensibility. *Polymer* **2008**, *49*, 5064-5071.
- (71) Yano, S.; Mori, M.; Teramoto, N.; Lisaka, M.; Suzuki, N.; Noto, M.; Kaimoto, Y.; Kakimoto, M.; Yamada, M.; Shiratsuchi, E.; Shimasaki, T.; Shibata, M. Preparation of photocrosslinked fish elastin polypeptide/microfibrillated cellulose composite gels with elastic properties for biomaterial applications. *Mar. Drugs* **2015**, *13*, 338-353.
- (72) Yuan, N.; Xu, L.; Wang, H.; Fu, Y.; Zhang, Z.; Liu, L.; Wang, C.; Zhao, J.; Rong, J. Dual physically cross-linked double network hydrogels with high mechanical strength, fatigue resistance, notch-insensitivity, and self-healing properties. *ACS Appl. Mater. Interfaces* **2016**, *8*, 34034-34044.
- (73) Bakarich, S. E.; Panhuis, M.; Beirne, S.; Wallace, G. G.; Spinks, G. M. Extrusion printing of ionic-covalent entanglement hydrogels with high toughness. *J. Mater. Chem. B* **2013**, *1*, 4939-4946.
- (74) Li, J. Illeperuma; W. R. K.; Suo, Z.; Vlassak, J. J. Hybrid hydrogels with extremely high stiffness and toughness. *ACS Macro Lett.* **2014**, *3*, 520-523.
- (75) Yang, C. H.; Wang, M. X.; Haider, H.; Yang, J. H.; Sun, J.-Y.; Chen, Y. M.; Zhou, J.; Suo, Z. Strengthening alginate/polyacrylamide hydrogels using various multivalent cations. *ACS Appl. Mater. Interfaces* **2013**, *5*, 10418-10422.
- (76) Lu, X.; Chan, C. Y.; Lee, K. I.; Ng, P. F.; Fei, B.; Xin, J. H.; Fu, J. Super-tough and thermo-healable hydrogel promising for shape-memory absorbent fiber. *J. Mater. Chem. B* **2014**, *2*, 7631-7638.
- (77) Li, J.; Suo, Z.; Vlassak, J. J. Stiff, strong and tough hydrogels with good chemical stability. *J. Mater. Chem. B* **2014**, *2*, 6708-6713.
- (78) Yue, Y. F.; Haque, M. A.; Kurokawa, T.; Nakajima, T.; Gong, J. P. Lamellar hydrogels with high toughness and ternary tunable photonic stop-band. *Adv. Mater.* **2013**, *25*, 3106-3110.
- (79) Cong, H. P.; Wang, P.; Yu, S.-H. Stretchable and self-healing graphene oxide-polymer composite hydrogels: a dual-network design. *Chem. Mater.* **2013**, *25*, 3357-3362.
- (80) Xin, H.; Saricilar, S. Z.; Brown, H. R.; Whitten, P. G.; Spinks, G. M. Effect of first network topology on the toughness of double network hydrogels. *Macromolecules* **2013**, *46*, 6613-6620.
- (81) Es-haghi, S. S.; Leonov, A. I.; Weiss, R. A. Deconstructing the double-network hydrogels: the importance of grafted chains for achieving toughness. *Macromolecules* **2014**, *47*, 4769-4777.
